# Supplementary material for: Transcriptomic Changes of Photoperiodic Response in the Hypothalamus Were Identified in Ovariectomized and Estradiol-Treated Sheep
Source: Front Mol Biosci. 2022 Apr 11;9:848144. doi: 10.3389/fmolb.2022.848144 (PMC9036065; doi:10.3389/fmolb.2022.848144)
Supplement: Supplementary file 2 [file Table3.XLSX]

## Sheet: 1
Term_name	GO_Type	FDR	Gene_number
RNA guanylyltransferase activity	molecular_function	0.00022575	12
guanylyltransferase activity	molecular_function	0.00022575	12
snRNA binding	molecular_function	0.00097188	8
intracellular signal transduction	biological_process	0.0013628	803
actin filament organization	biological_process	0.0016558	53
barbed-end actin filament capping	biological_process	0.002401	11
double-stranded RNA binding	molecular_function	0.0027478	3
U5 snRNA binding	molecular_function	0.0028074	3
positive regulation of cellular process	biological_process	0.0029526	314
mRNA guanylyltransferase activity	molecular_function	0.0030569	11
small GTPase mediated signal transduction	biological_process	0.0030854	415
positive regulation of biological process	biological_process	0.0032845	344
binding	molecular_function	0.0033449	11885
regulation of actin polymerization or depolymerization	biological_process	0.0037754	38
actin polymerization or depolymerization	biological_process	0.0037754	38
actin filament polymerization	biological_process	0.0037754	38
regulation of actin filament length	biological_process	0.0037754	38
nucleoside-triphosphatase regulator activity	molecular_function	0.0038403	283
U6 snRNA binding	molecular_function	0.0052575	3
4-hydroxy-tetrahydrodipicolinate reductase	molecular_function	0.0052899	14
proton-transporting two-sector ATPase complex	cellular_component	0.006315	197
proton-transporting V-type ATPase complex	cellular_component	0.0085659	86
F-actin capping protein complex	cellular_component	0.013723	8
proton-transporting two-sector ATPase complex, proton-transporting domain	cellular_component	0.017449	136
nucleus	cellular_component	0.030229	2062
extracellular region part	cellular_component	0.040418	498
vacuolar proton-transporting V-type ATPase, V1 domain	cellular_component	0.043659	22
vacuolar proton-transporting V-type ATPase complex	cellular_component	0.043659	22
signal recognition particle, endoplasmic reticulum targeting	cellular_component	0.048508	2
vacuolar membrane	cellular_component	0.050135	24

## Sheet: 2
Term_name	GO_Type	FDR	Gene_number
RNA binding	molecular_function	0.00052457	795
small GTPase mediated signal transduction	biological_process	0.00082001	415
iron ion transmembrane transporter activity	molecular_function	0.001576	95
iron ion transport	biological_process	0.002595	101
vacuole	cellular_component	0.0028046	29
four-way junction helicase activity	molecular_function	0.0030714	62
ferrous iron transport	biological_process	0.0032664	89
ferrous iron transmembrane transporter activity	molecular_function	0.0032664	89
DNA helicase activity	molecular_function	0.0034966	119
HAUS complex	cellular_component	0.0038967	4
GTP binding	molecular_function	0.0058545	556
guanyl ribonucleotide binding	molecular_function	0.0066188	561
transition metal ion transmembrane transporter activity	molecular_function	0.0066715	137
anion binding	molecular_function	0.0069714	2380
guanyl nucleotide binding	molecular_function	0.0070786	563
cellular response to stress	biological_process	0.0084128	591
DNA repair	biological_process	0.0089155	503
carbohydrate biosynthetic process	biological_process	0.010914	95
response to DNA damage stimulus	biological_process	0.012987	553
SRP-dependent cotranslational protein targeting to membrane	biological_process	0.014227	46
protein targeting to ER	biological_process	0.014227	46
establishment of protein localization to endoplasmic reticulum	biological_process	0.014227	46
dystroglycan complex	cellular_component	0.021314	18
sarcoglycan complex	cellular_component	0.021314	18
U1 snRNP	cellular_component	0.031941	7
small nuclear ribonucleoprotein complex	cellular_component	0.031941	7
dystrophin-associated glycoprotein complex	cellular_component	0.037103	23
vacuolar proton-transporting V-type ATPase, V1 domain	cellular_component	0.04465	22
vacuolar proton-transporting V-type ATPase complex	cellular_component	0.04465	22
signal recognition particle, endoplasmic reticulum targeting	cellular_component	0.046097	2

## Sheet: 3
Term_name	GO_Type	FDR	Gene_number
4-hydroxy-3-methylbut-2-en-1-yl diphosphate synthase activity	molecular_function	0.0039562	4
cell	cellular_component	0.0020304	5859
cell cycle	biological_process	0.0026526	537
cell division	biological_process	0.00021542	146
cell part	cellular_component	0.0020304	5859
cellular macromolecule localization	biological_process	0.0031333	719
cellular protein localization	biological_process	0.0031333	719
cofactor transporter activity	molecular_function	0.012313	13
connexin binding	molecular_function	0.0071535	4
cytokinesis	biological_process	0.0020253	113
diacylglycerol O-acyltransferase activity	molecular_function	0.013024	5
DNA-directed DNA polymerase activity	molecular_function	0.012598	104
extracellular matrix	cellular_component	0.0049137	221
extracellular region part	cellular_component	0.0031994	498
hydrogen transport	biological_process	0.0033809	214
intracellular	cellular_component	0.0032488	5470
intracellular part	cellular_component	0.0026085	5106
macromolecular complex	cellular_component	0.00040243	3001
oxidoreductase activity, acting on CH or CH2 groups, with an iron-sulfur protein as acceptor	molecular_function	0.0039562	4
peptide biosynthetic process	biological_process	0.0029215	16
protein complex	cellular_component	0.0029925	2078
proteinaceous extracellular matrix	cellular_component	0.00048522	147
proton transport	biological_process	0.0033809	214
proton-transporting two-sector ATPase complex	cellular_component	0.0043927	197
ribosome binding	molecular_function	0.011736	6
selenium binding	molecular_function	0.0068679	4
spermine biosynthetic process	biological_process	0.0036775	3
spermine metabolic process	biological_process	0.0036775	3
transferase activity, transferring pentosyl groups	molecular_function	0.011623	86
tRNA A64-2'-O-ribosylphosphate transferase activity	molecular_function	0.0045774	11

## Sheet: 4
Term_name	GO_Type	FDR	Gene_number
barrier septum assembly	biological_process	0.014158	96
binding	molecular_function	0.0035205	11885
cell periphery	cellular_component	0.0090026	605
cell septum assembly	biological_process	0.014158	96
cellular catabolic process	biological_process	0.012403	593
cytokinetic process	biological_process	0.014158	96
macromolecular complex	cellular_component	0.02309	3001
mitochondrial membrane part	cellular_component	0.013986	153
mitochondrial respiratory chain	cellular_component	0.002871	51
mitochondrial respiratory chain complex I	cellular_component	0.011761	32
NADH dehydrogenase complex	cellular_component	0.011761	32
nucleoside diphosphate metabolic process	biological_process	0.0032887	15
proteasome assembly	biological_process	0.010744	29
respiratory chain	cellular_component	0.0055201	56
respiratory chain complex I	cellular_component	0.011761	32
RNA binding	molecular_function	0.0068537	795
RNA ligase activity	molecular_function	0.004943	8
snRNA 3'-end processing	biological_process	0.015537	5
snRNA metabolic process	biological_process	0.015537	5
snRNA processing	biological_process	0.015537	5
solute:cation symporter activity	molecular_function	0.0014925	49
structural molecule activity	molecular_function	0.005089	1473
sulfur compound binding	molecular_function	0.0031845	56
symporter activity	molecular_function	0.0014925	49
transaminase activity	molecular_function	0.0097831	11
transferase activity, transferring nitrogenous groups	molecular_function	0.0097831	11
U6 snRNA 3'-end processing	biological_process	0.015537	5
U6 snRNA binding	molecular_function	0.0083749	3
vacuolar proton-transporting V-type ATPase complex	cellular_component	0.019591	22
vacuolar proton-transporting V-type ATPase, V1 domain	cellular_component	0.019591	22

## Sheet: 5
Term_name	GO_Type	FDR	Gene_number
barrier septum assembly	biological_process	4.9365e-06	96
binding	molecular_function	2.3898e-05	11885
calcium-mediated signaling	biological_process	3.3851e-05	12
cell division	biological_process	3.0189e-05	146
cell septum assembly	biological_process	4.9365e-06	96
cytokinesis	biological_process	4.8027e-06	113
cytokinetic process	biological_process	4.9365e-06	96
cytoplasm	cellular_component	0.0017129	2718
GTPase activity	molecular_function	0.0020204	406
heterocyclic compound binding	molecular_function	0.00062324	5718
intracellular membrane-bounded organelle	cellular_component	0.00049843	3047
intracellular organelle	cellular_component	0.0025792	4260
intracellular part	cellular_component	0.0017311	5106
membrane-bounded organelle	cellular_component	0.0005097	3048
mitochondrion	cellular_component	0.00029735	433
NADH dehydrogenase (quinone) activity	molecular_function	0.0016813	49
NADH dehydrogenase (ubiquinone) activity	molecular_function	0.0016813	49
nucleoplasm	cellular_component	0.0045571	346
nucleoplasm part	cellular_component	0.0045571	346
organelle	cellular_component	0.0026244	4261
organic cyclic compound binding	molecular_function	0.00063412	5719
phosphoprotein phosphatase activity	molecular_function	0.0022794	130
protein tyrosine phosphatase activity	molecular_function	0.00091364	105
proton-transporting two-sector ATPase complex, proton-transporting domain	cellular_component	0.0038705	136
regulation of barrier septum assembly	biological_process	0.00011443	3
regulation of cell septum assembly	biological_process	0.00011443	3
regulation of cytokinetic process	biological_process	0.00011443	3
RNA binding	molecular_function	1.4819e-08	795
second-messenger-mediated signaling	biological_process	3.3851e-05	12
tRNA A64-2'-O-ribosylphosphate transferase activity	molecular_function	0.0022766	11

## Sheet: 6
Term_name	GO_Type	FDR	Gene_number
asexual reproduction	biological_process	0.00027468	104
barrier septum assembly	biological_process	0.00029731	96
binding	molecular_function	0.00022314	11885
catabolic process	biological_process	0.00026725	724
cation transmembrane transporter activity	molecular_function	0.00035203	873
cell cycle	biological_process	0.00028847	537
cellular catabolic process	biological_process	3.4061e-05	593
cytokinesis by binary fission	biological_process	0.00012916	90
cytokinetic process	biological_process	0.00029731	96
cytoplasm	cellular_component	6.6935e-06	2718
envelope	cellular_component	8.3238e-05	337
GTPase activity	molecular_function	0.0011285	406
hydrogen transport	biological_process	0.00020697	214
inorganic cation transmembrane transporter activity	molecular_function	0.00064554	740
inorganic phosphate transmembrane transporter activity	molecular_function	0.0018573	8
intracellular part	cellular_component	1.6733e-05	5106
mitochondrial envelope	cellular_component	1.5128e-05	279
mitochondrial inner membrane	cellular_component	0.00019748	157
mitochondrial membrane	cellular_component	9.4786e-06	250
mitochondrial part	cellular_component	0.00010731	305
organelle envelope	cellular_component	0.00011546	312
organelle inner membrane	cellular_component	0.00019552	165
oxygen binding	molecular_function	0.0012983	18
phosphate transmembrane transporter activity	molecular_function	0.0018573	8
proton transport	biological_process	0.00020697	214
proton-transporting two-sector ATPase complex	cellular_component	0.00014091	197
reproduction of a single-celled organism	biological_process	6.3834e-05	93
RNA binding	molecular_function	0.00060529	795
sulfur compound binding	molecular_function	0.00074215	56
thiamine pyrophosphate binding	molecular_function	0.00049595	21
